# Supplementary material for: A simple hydrazone as a multianalyte (Cu2+, Al3+, Zn2+) sensor at different pH values and the resultant Al3+ complex as a sensor for F−
Source: Royal Society of Chemistry journal article supplement (doi:10.1039/c7ra10219d), 2018-01-01
Supplement: c7ra10219d1.pdf [file c7ra10219d1.pdf]

### Supporting information for

#### A simple hydrazone as a multianalyte ( $\text{Cu}^{2+}$ , $\text{Al}^{3+}$ , $\text{Zn}^{2+}$ ) sensor at different pH value and resultant $\text{Al}^{3+}$ complex as a sensor for $\text{F}^-$

Wei-Na Wu, Hao Wu, Yuan Wang\*, Xian-Jie Mao, Bao-Zhong Liu\*, Xiao-Lei Zhao, Zhou-Qing Xu,

Yun-Chang Fan, Zhi-Hong Xu\*

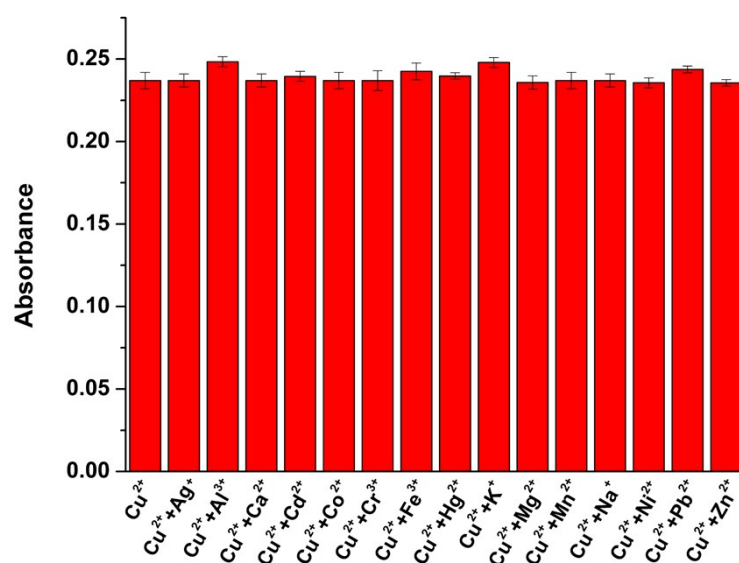

**Fig. S1** The effect of 1 eq. coexistent metal cations on the absorbance at 398 nm of **1** (5  $\mu\text{M}$ ) with 1 eq.

$\text{Cu}^{2+}$  in buffered  $\text{CH}_3\text{CN}/\text{HEPES}$  solution (10 mM, 1/1, v/v, pH=6.0).

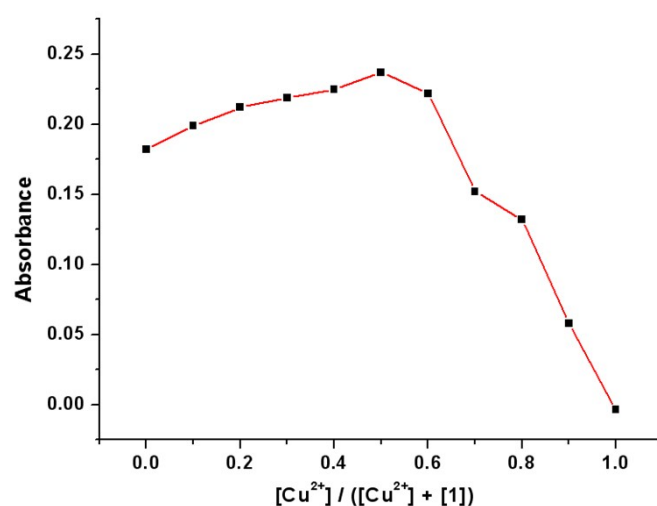

**Fig. S2** Job plots of **1** and  $\text{Cu}^{2+}$  in buffered  $\text{CH}_3\text{CN}/\text{HEPES}$  solution (10 mM, 1/1, v/v, pH=6.0)

according to the absorbance at 398 nm. The total concentration of **1** and  $\text{Cu}^{2+}$  were all kept at 10  $\mu\text{M}$ .

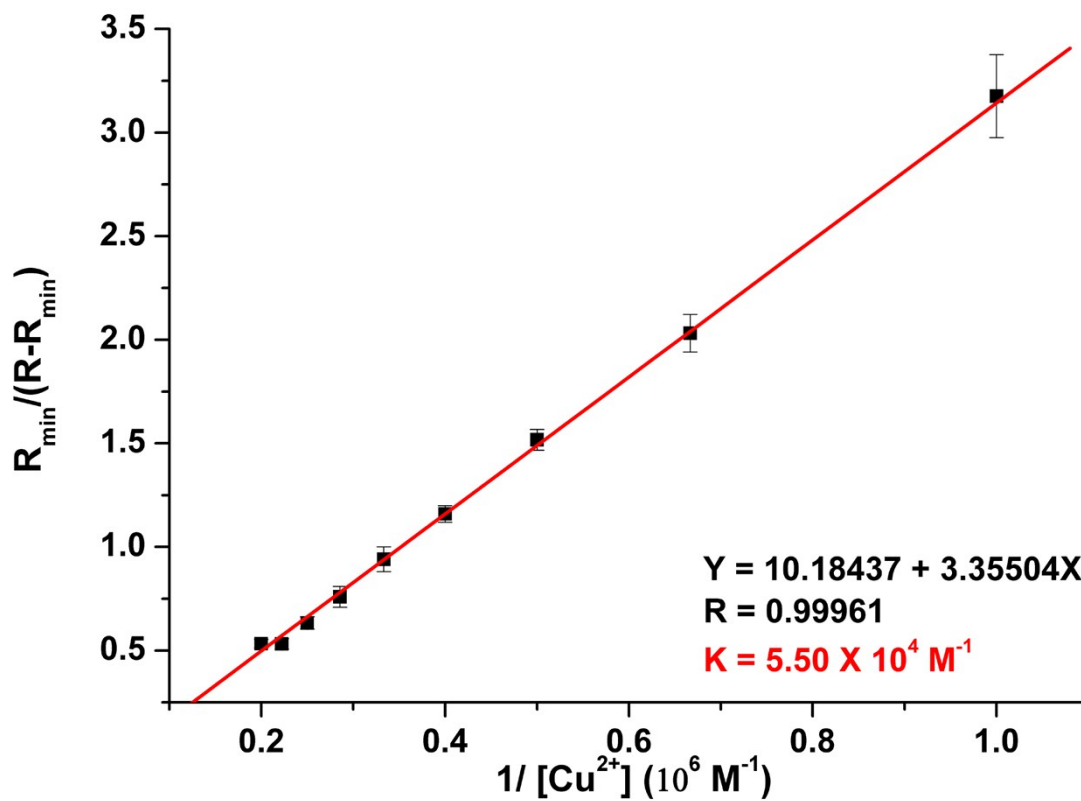

Fig. S3 The Benesi-Hildebrand plot of the 1-Cu<sup>2+</sup> complex, R= A<sub>398</sub>/A<sub>376</sub>.

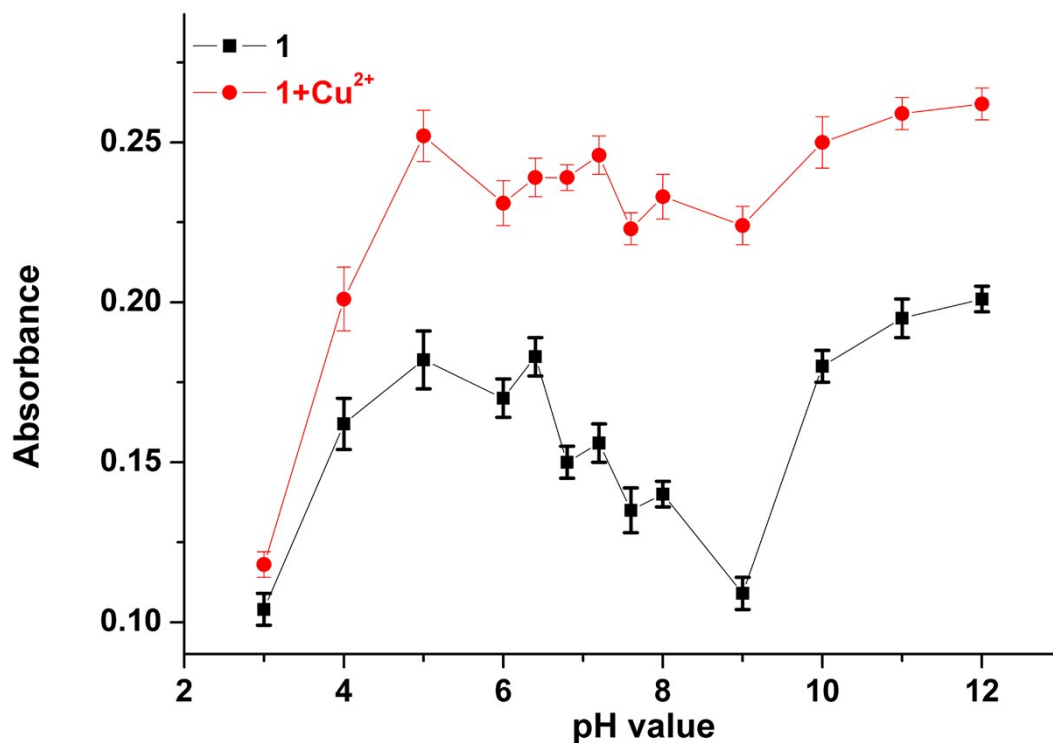

Fig. S4 The effect of pH (3.0-12.0) on the relative absorbance at 398 nm of 5 μM probe 1 with 1 eq.

Cu<sup>2+</sup> in CH<sub>3</sub>CN/HEPES solution (10 mM, 1/1, v/v).

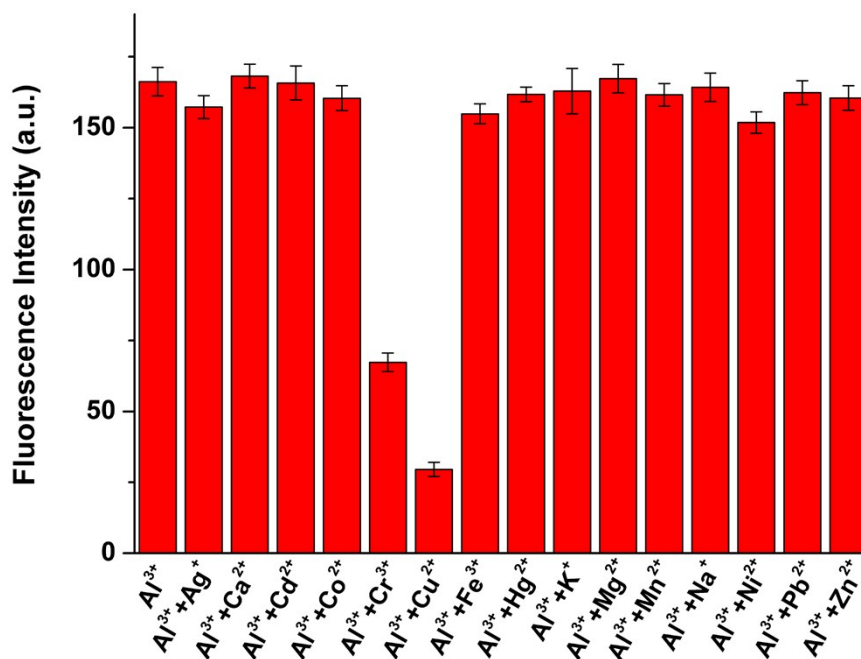

**Fig. S5** The effect of 1 eq. coexistent metal cations on fluorescence intensity at 460 nm of **1** (5  $\mu$ M) with 1 eq. Al<sup>3+</sup> in buffered CH<sub>3</sub>CN/HEPES solution (10 mM, 1/1, v/v, pH=6.0). Excitation wavelength was 390 nm (the pass width of emission and excitation being 2.5 nm).

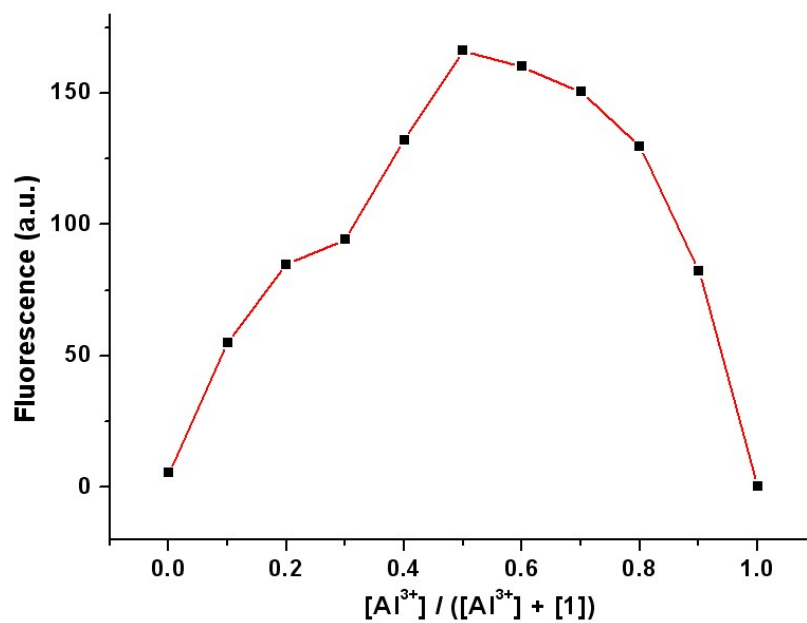

**Fig. S6** Job plots of **1** and Al<sup>3+</sup> in buffered CH<sub>3</sub>CN/HEPES solution (10 mM, 1/1, v/v, pH=6.0) according to the fluorescence at 460 nm ( $\lambda_{\text{ex}} = 390$  nm). The total concentration of **1** and Al<sup>3+</sup> were all kept at 10  $\mu$ M.

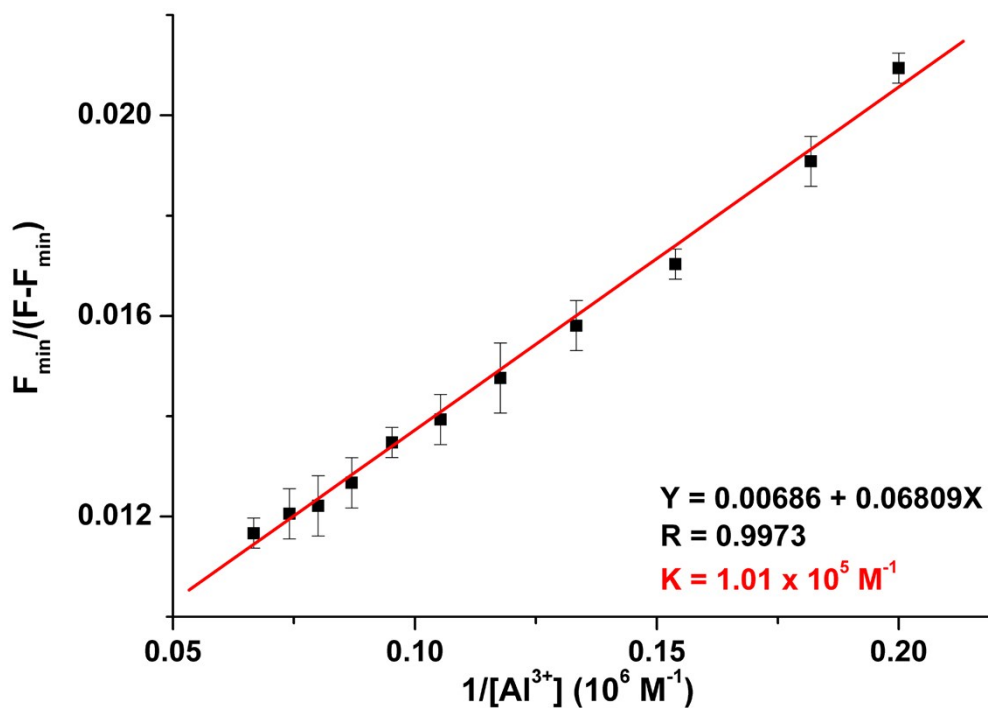

Fig. S7 The Benesi-Hildebrand plot of the 1-Al<sup>3+</sup> complex.

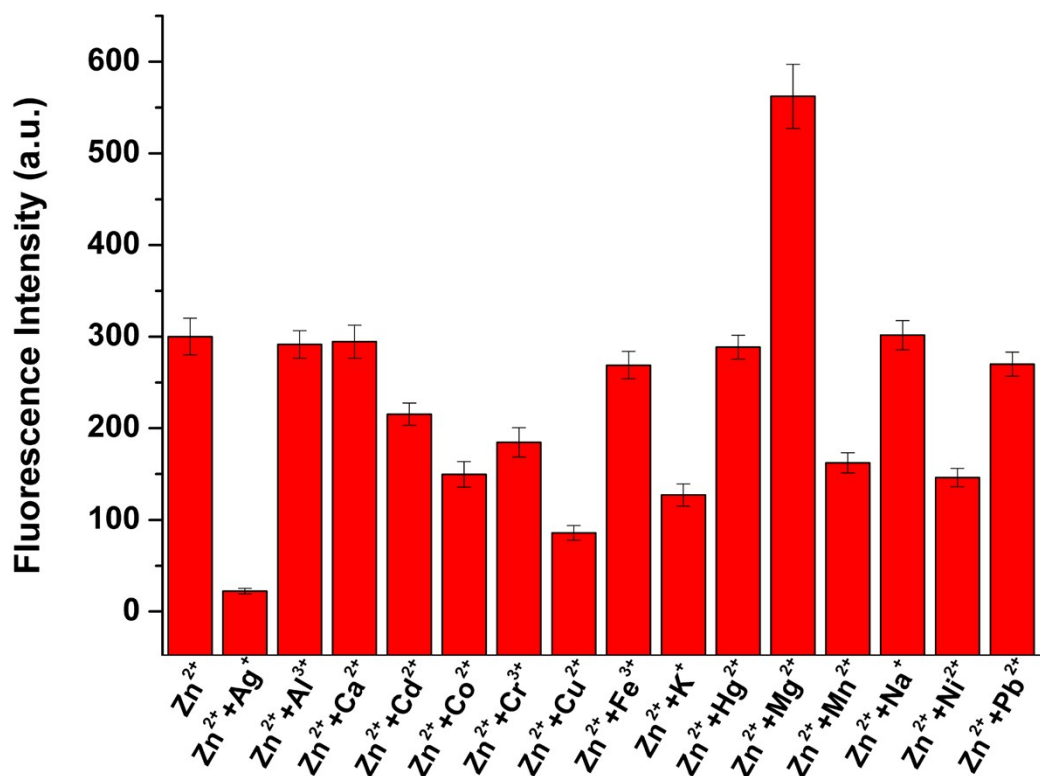

Fig. S8 The effect of 1 eq. coexistent metal cations on fluorescence intensity at 460 nm of **1** (5 μM) with 1 eq. Zn<sup>2+</sup> in buffered CH<sub>3</sub>CN/HEPES solution (10 mM, 1/1, v/v, pH=10.0). Excitation wavelength was 390 nm (the pass width of emission and excitation being 5 nm).

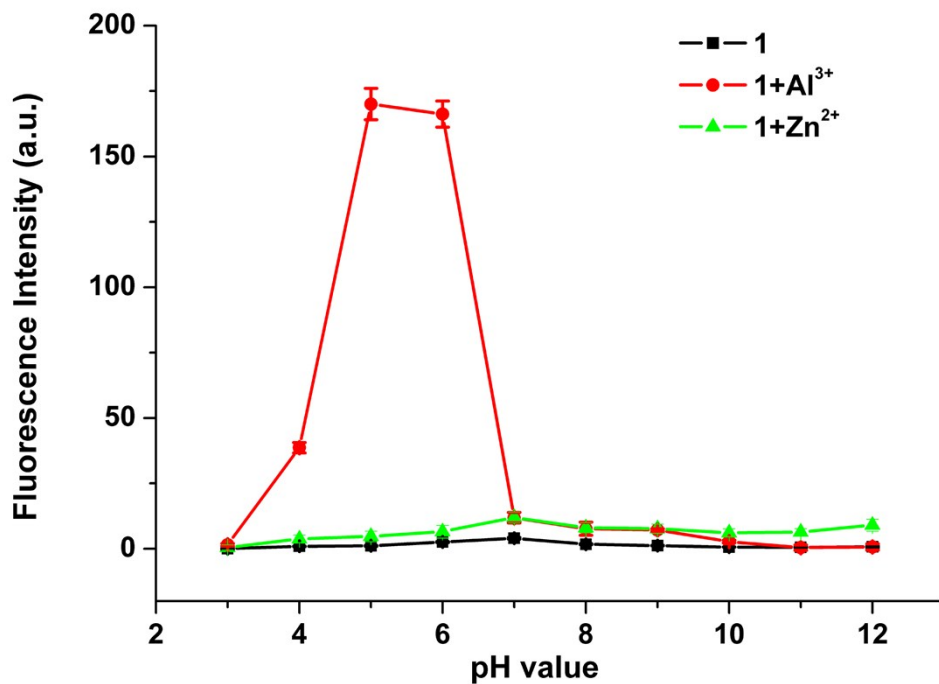

**Fig. S9** The effect of pH (3.0-12.0) on the relative fluorescence intensity of 5  $\mu$ M probe **1** with 1 eq. Al<sup>3+</sup> or Zn<sup>2+</sup> in CH<sub>3</sub>CN/HEPES solution (10 mM, 1/1, v/v), the pass width is 2.5 nm and excitation wavelength is 390 nm.

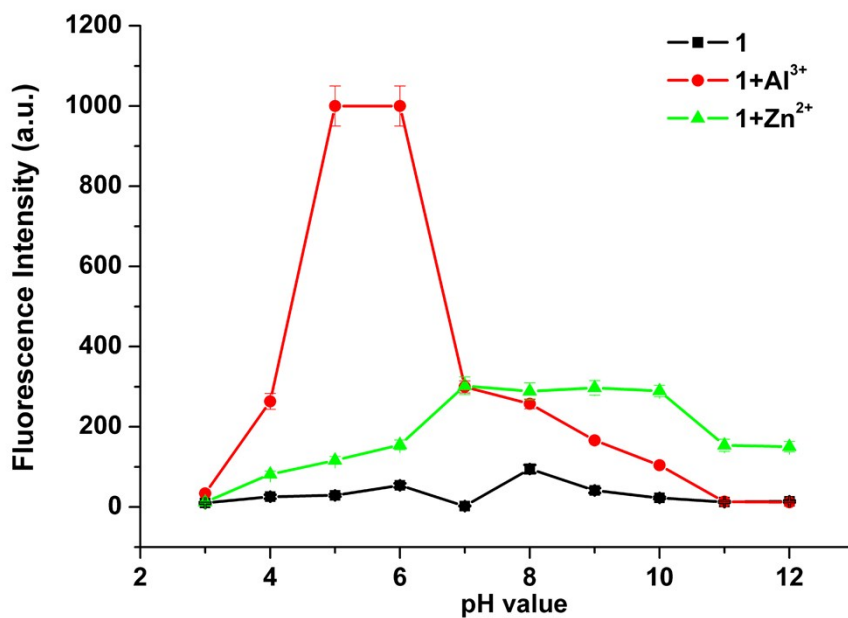

**Fig. S10** The effect of pH (3.0-12.0) on the relative fluorescence intensity of 5  $\mu$ M probe **1** with 1 eq. Al<sup>3+</sup> or Zn<sup>2+</sup> in CH<sub>3</sub>CN/HEPES solution (10 mM, 1/1, v/v), the pass width is 5 nm and excitation wavelength is 390 nm.

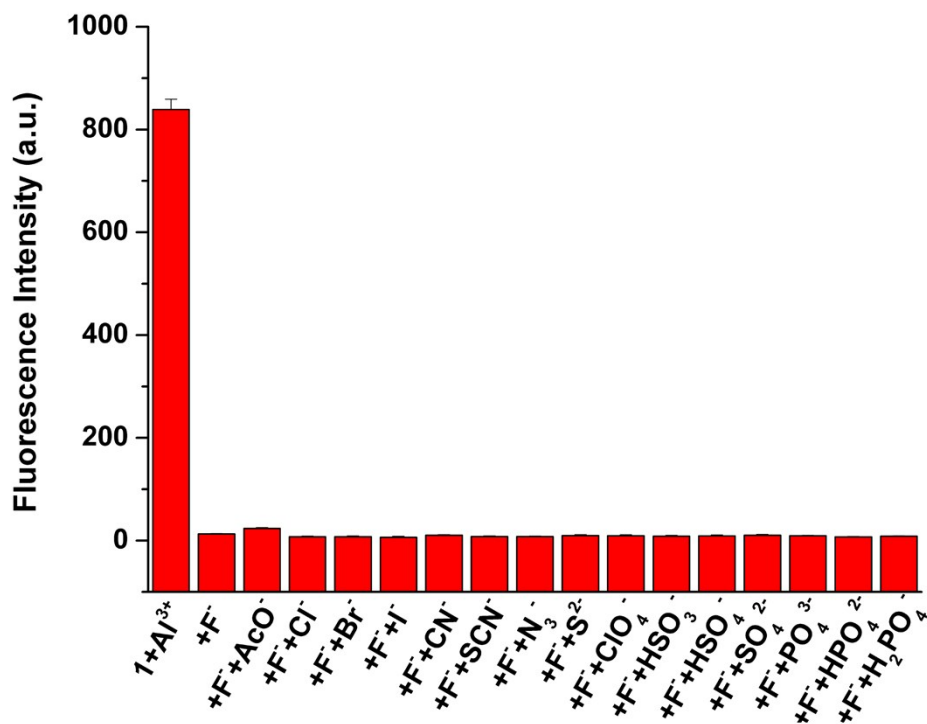

**Fig. S11** The effect of 10 eq. coexistent anions on fluorescence intensity at 460 nm of 1+Al<sup>3+</sup> (5  $\mu$ M) with 10 eq. F<sup>-</sup> in buffered CH<sub>3</sub>CN/HEPES solution (10 mM, 1/1, v/v, pH=6.0). Excitation wavelength was 390 nm (the pass width of emission and excitation being 2.5 and 5 nm, respectively).

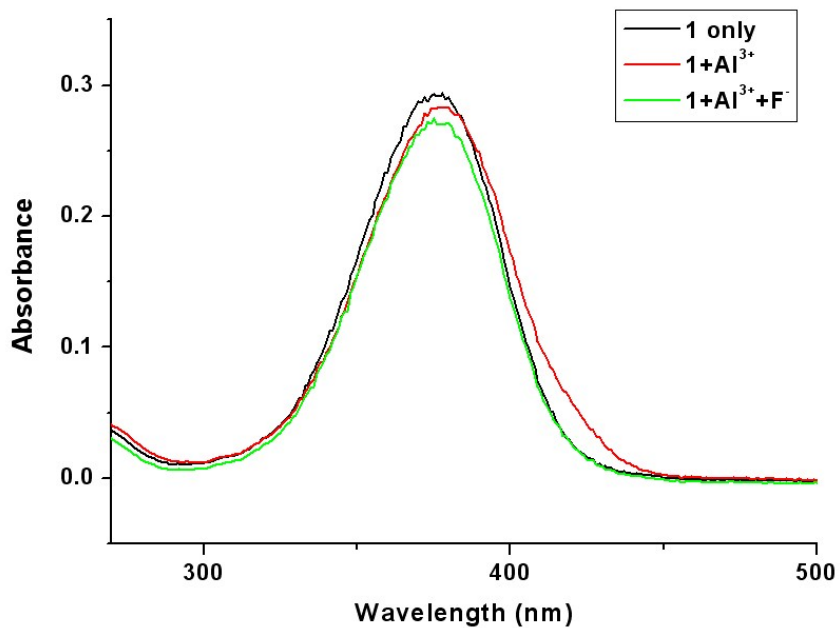

**Fig. S12** Absorption spectra of 5  $\mu$ M probe 1, 1+Al<sup>3+</sup> in the absence and presence of 10 eq. F<sup>-</sup> in buffered CH<sub>3</sub>CN/HEPES solution (10 mM, 1/1, v/v, pH=6.0).

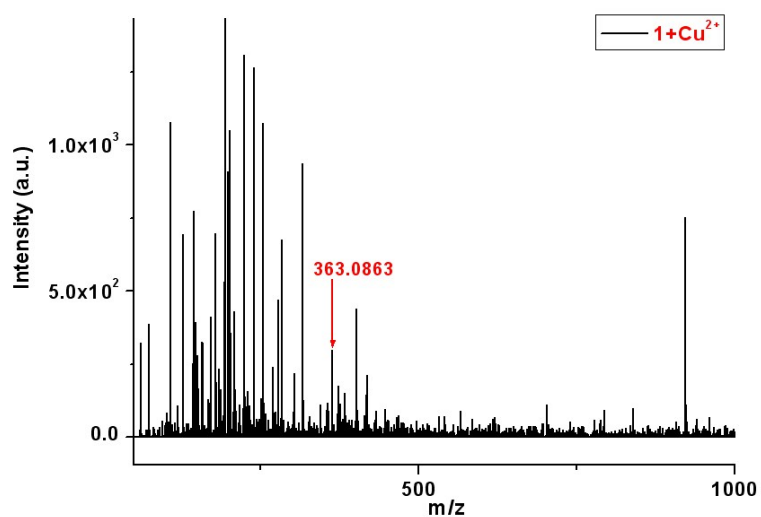

Fig. S13 ESI-MS spectrum of the sensor **1** with Cu<sup>2+</sup> in CH<sub>3</sub>CN solution.

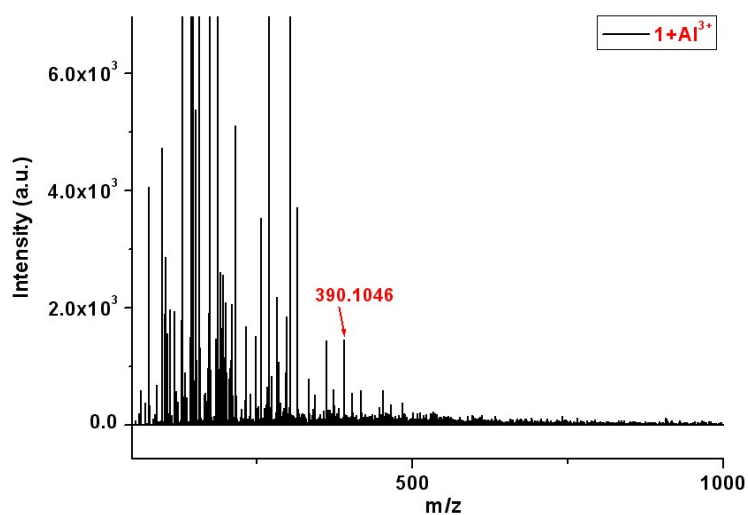

Fig. S14 ESI-MS spectrum of the sensor **1** with Al<sup>3+</sup> in CH<sub>3</sub>CN solution.

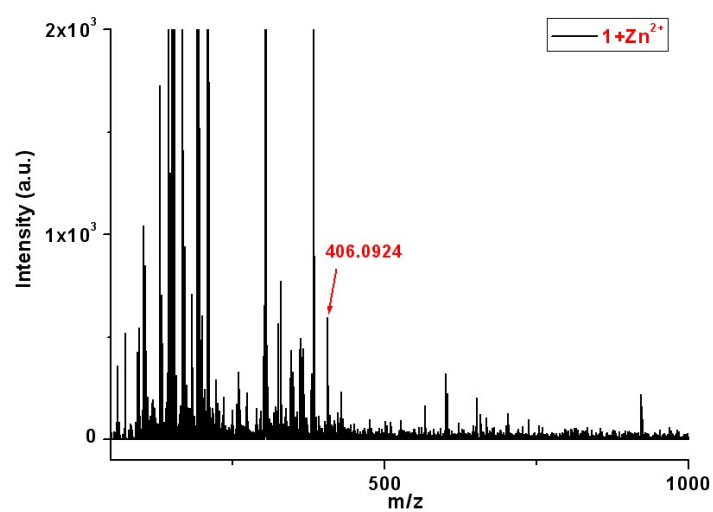

Fig. S15 ESI-MS spectrum of the sensor **1** with Zn<sup>2+</sup> in CH<sub>3</sub>CN solution.

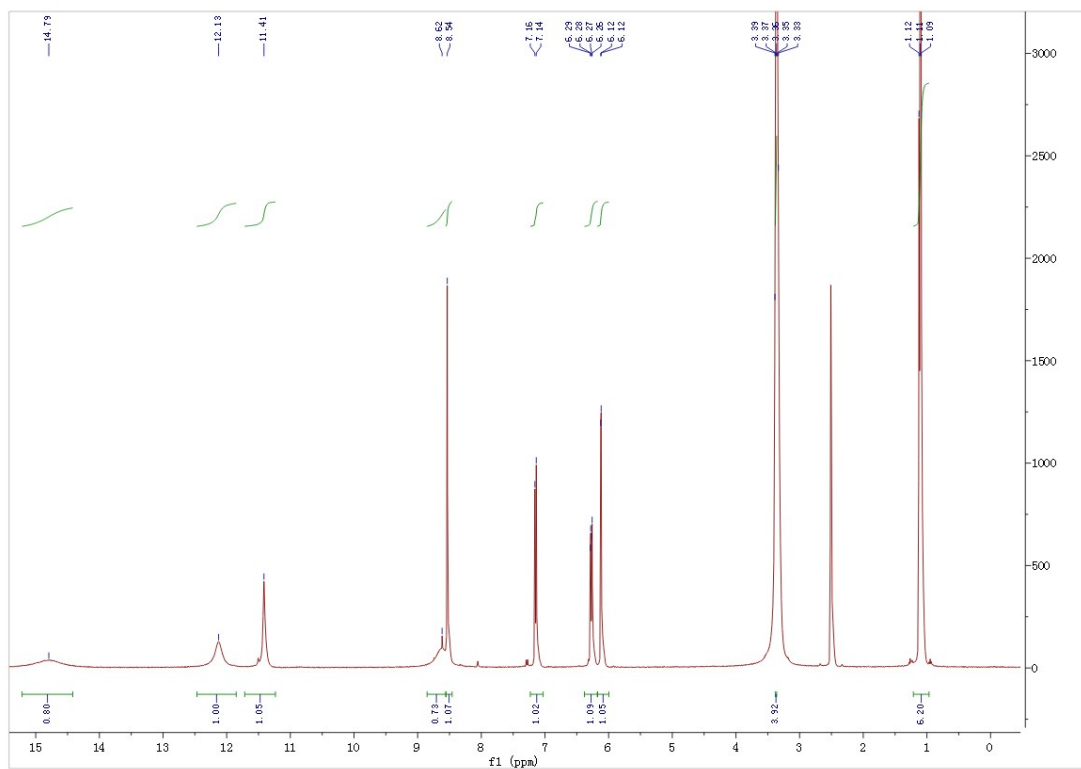

Fig. S16  $^1\text{H}$  NMR spectrum of **1**.

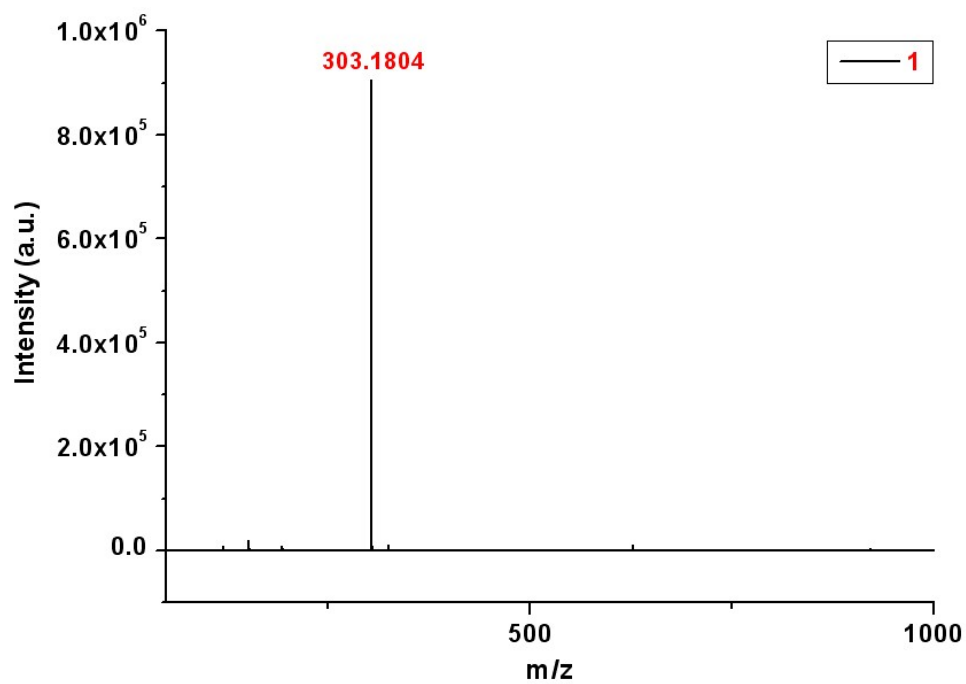

Fig. S17 ESI-MS spectrum of **1** in  $\text{CH}_3\text{CN}$  solution.
